# Supplementary material
Source: publisher site journal article supplement (https://www.dovepress.com/article/228462)

# **Supporting Information**

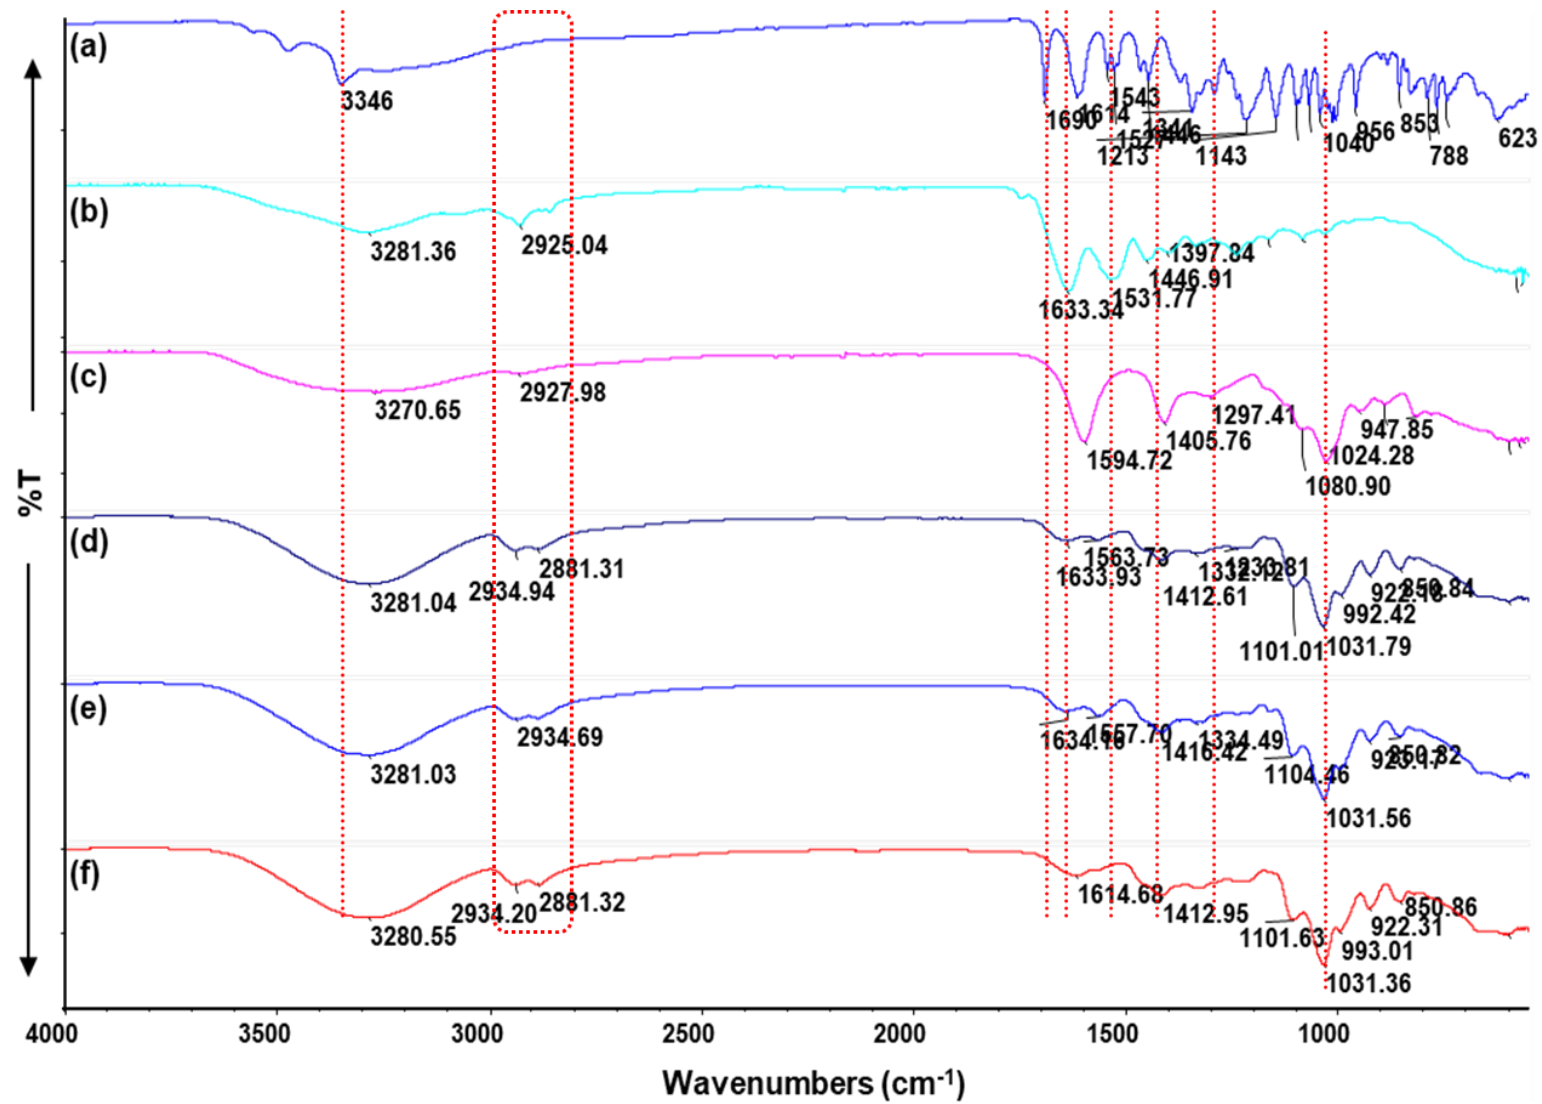

**Figure S1.** FT-IR characterization of hydrogel nanocomposites. **a)** EGCG. **b)** Gelatin. **c)** Sodium Alginate. **d)** HG. **e)** HG-Ag. **f)** HG-Ag-EGCG.

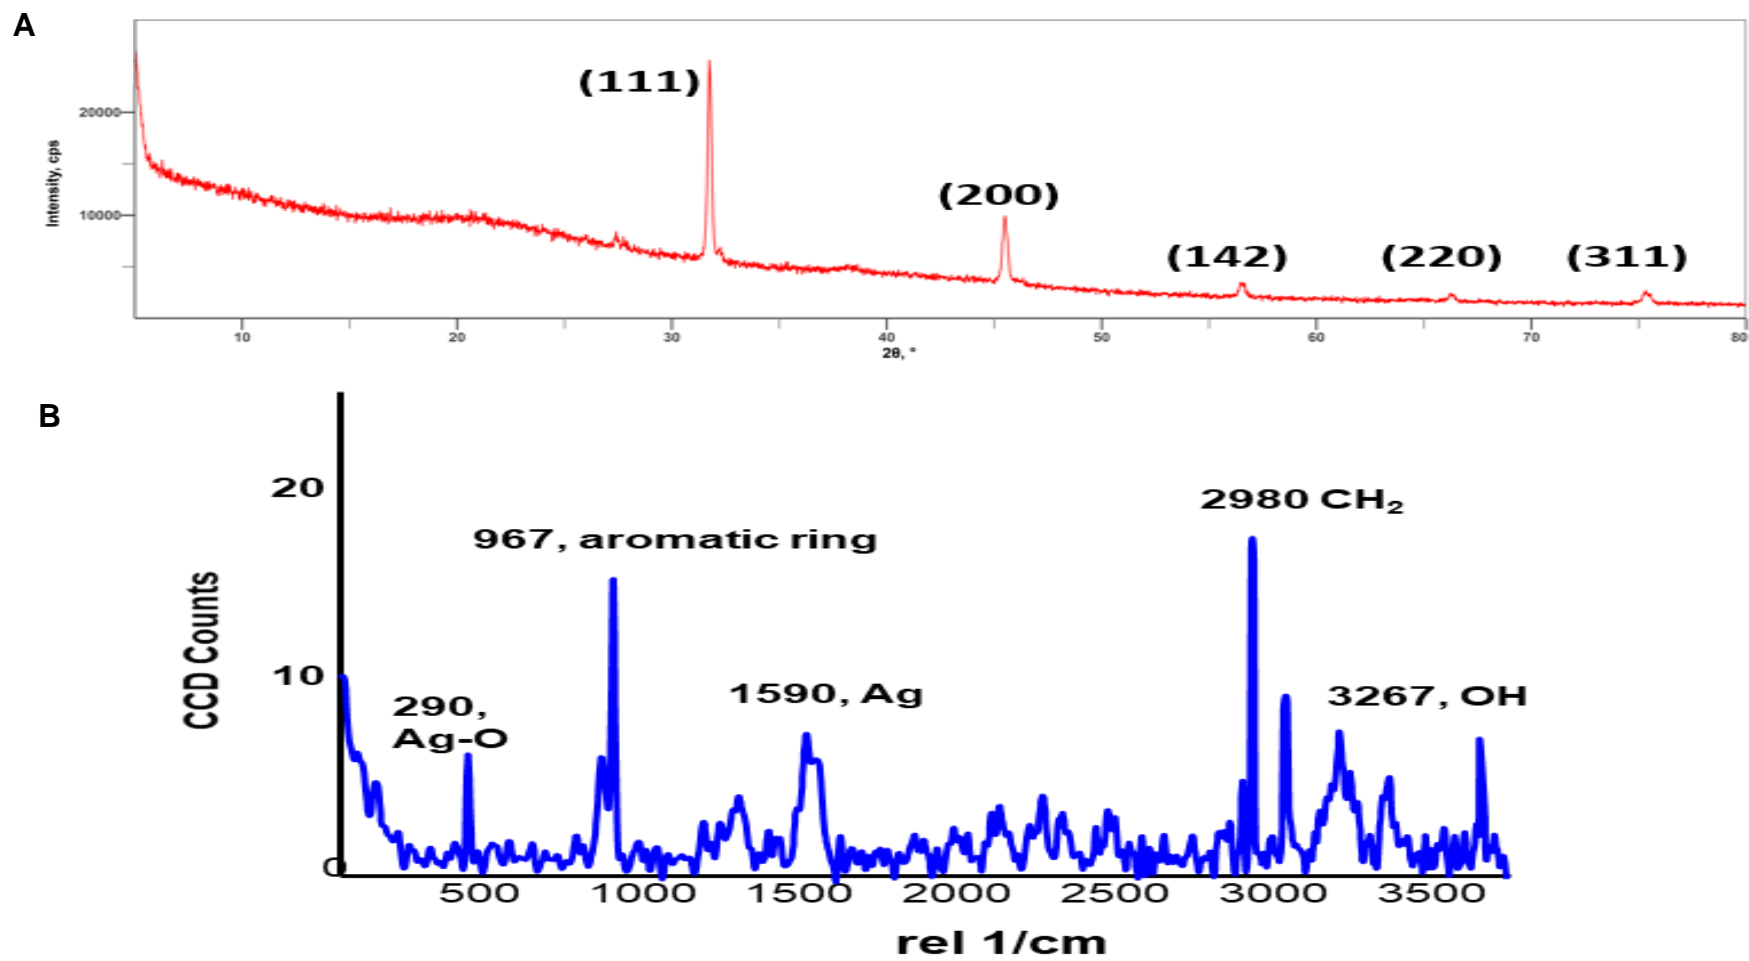

**Figure S2.** (A) XRD spectra displaying silver Miller indices peaks (JCPDS file No. 04-0783) and (B) Raman spectra of HG-Ag-EGCG displaying the characteristic frequencies of individual components.

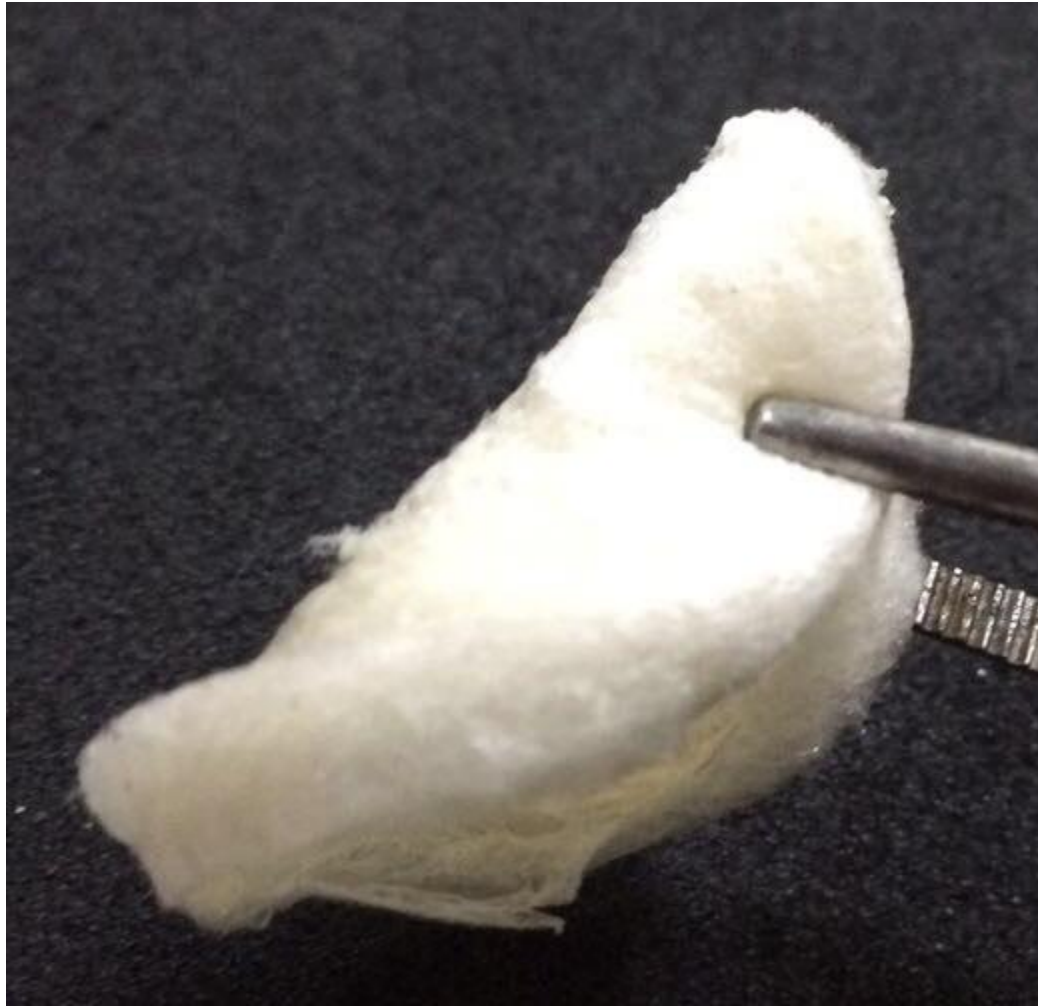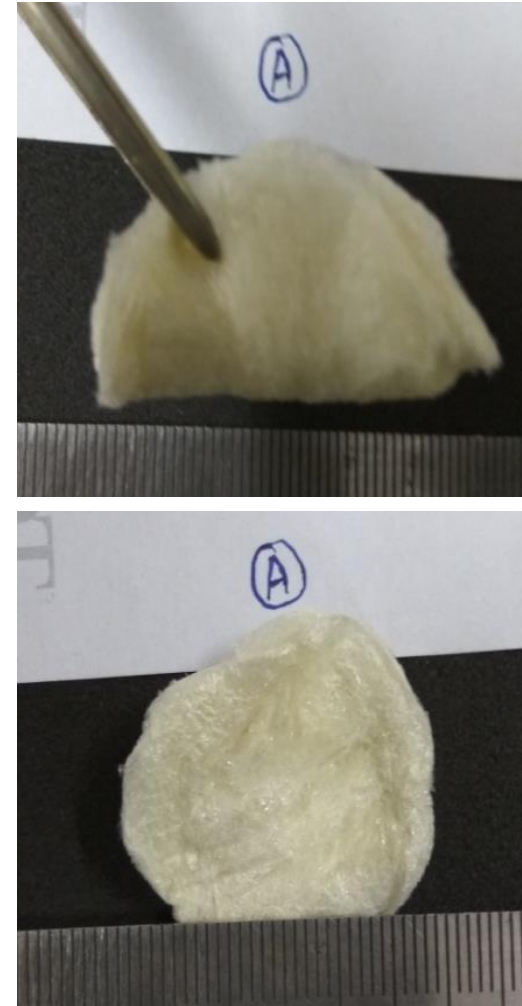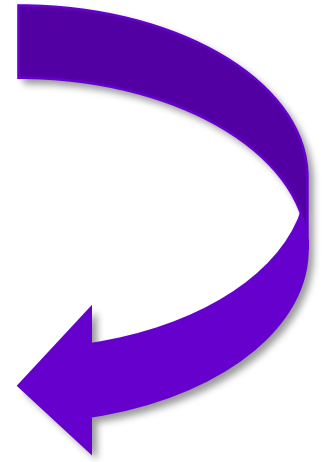

**Figure S3.** Physical twisting of HG hydrogel displaying ample flexibility to withstand the stress and strain.

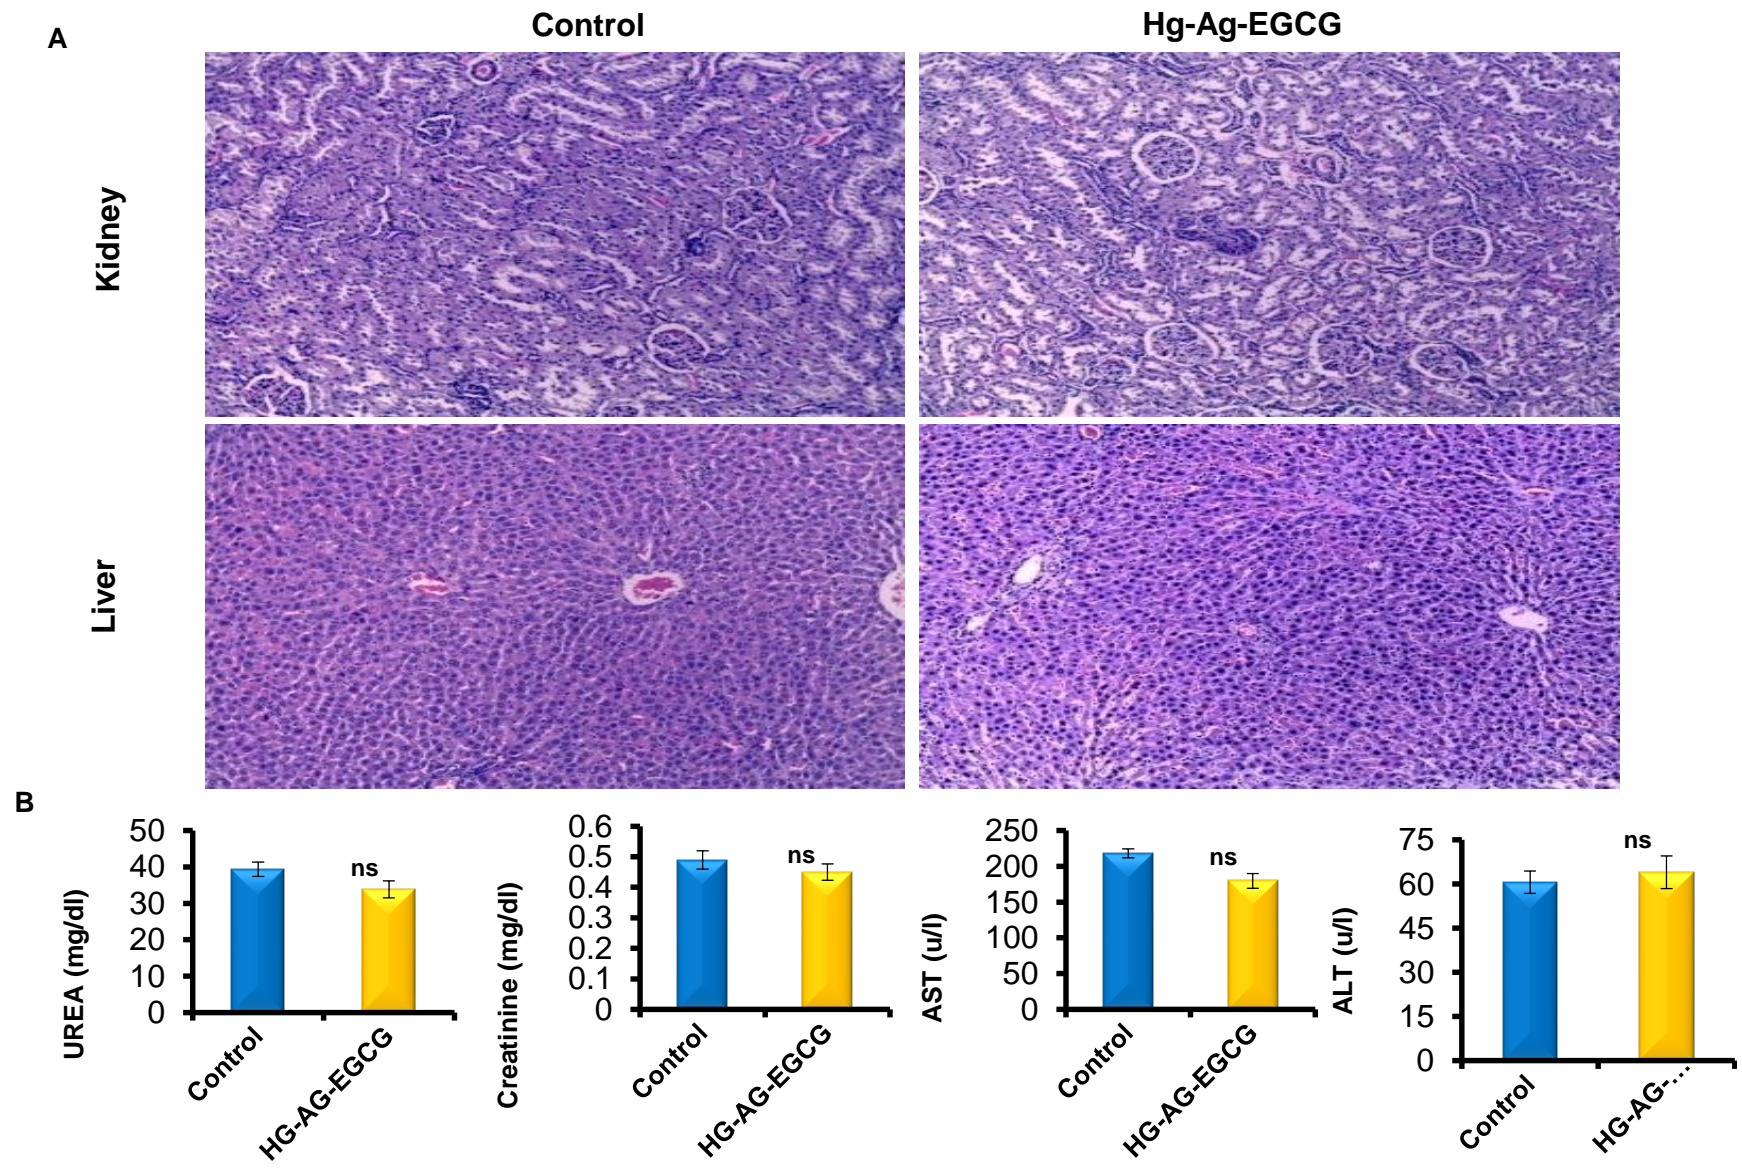

**Figure S4. Systemic toxicity of HG-Ag-EGCG.** (A) H&E stain of kidney and liver sections shows no visible damage in their microstructure with our wound patch (Images were obtained at 20x magnification). (B) Biochemical parameters (Urea, Creatinine; kidney, AST, ALT; liver) shows no significant alterations compared to control, confirming excellent biocompatibility of HG-Ag-EGCG hydrogel wound patch (n = 3).

Figure S5 - Role of HG-Ag-EGCG towards fast wound healing

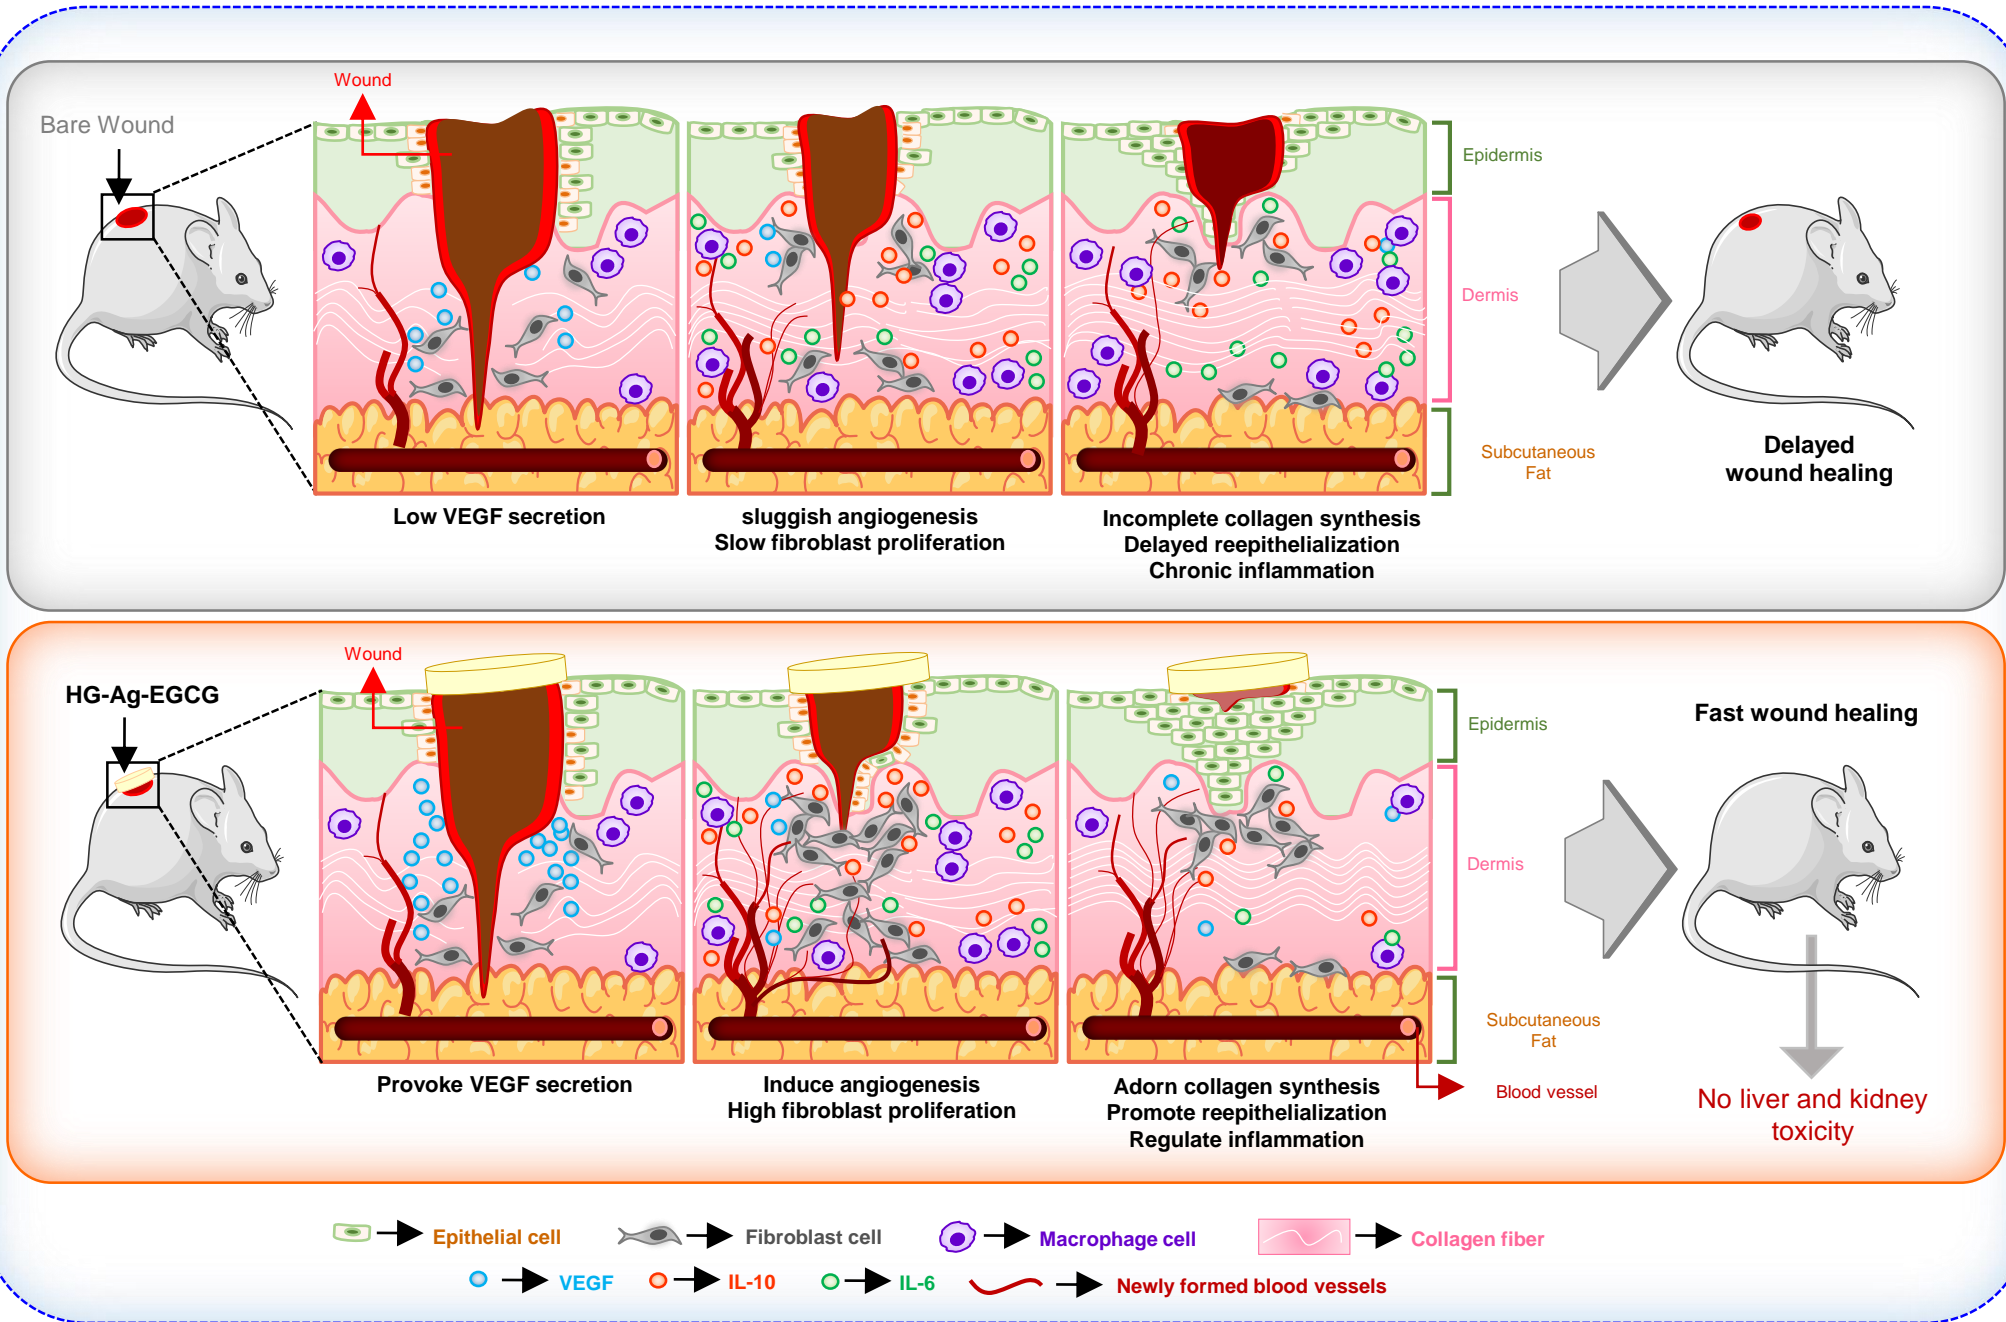

Supplement: Supplementary file 1 [file get_supplementary_file.php]
